# Supplementary material for: Immune Subtypes in LUAD Identify Novel Tumor Microenvironment Profiles With Prognostic and Therapeutic Implications
Source: PubMed Central journal article supplement (PMC9203850; doi:10.3389/fimmu.2022.877896), 2022-06-03

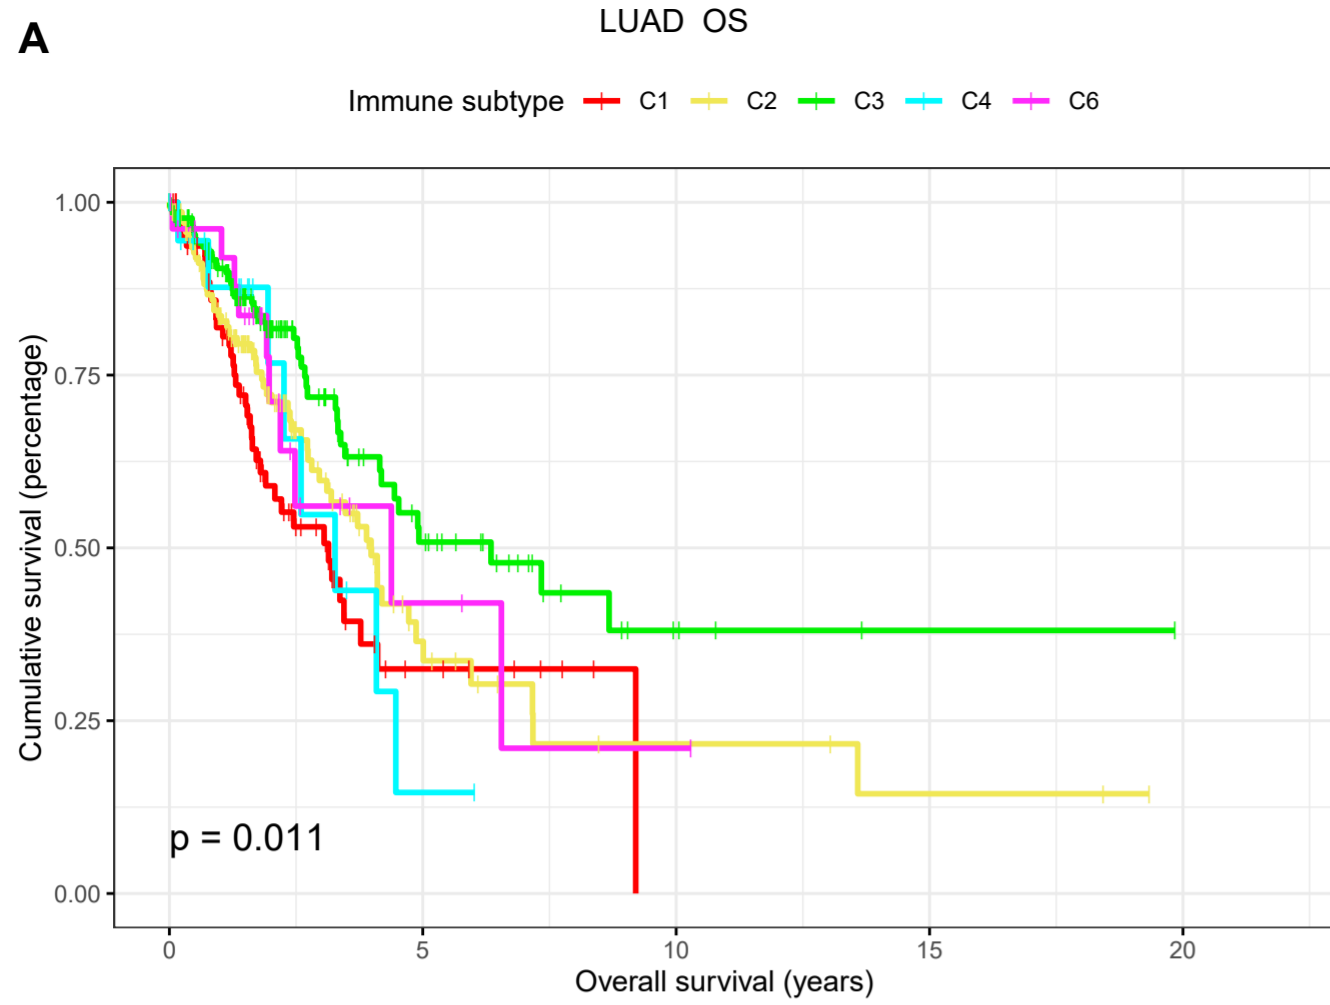

Number at risk

| Immune subtype | 0   | 5  | 10 | 15 | 20 |
|----------------|-----|----|----|----|----|
| C1             | 82  | 7  | 0  | 0  | 0  |
| C2             | 142 | 13 | 4  | 2  | 0  |
| C3             | 178 | 24 | 4  | 1  | 0  |
| C4             | 19  | 1  | 0  | 0  | 0  |
| C6             | 27  | 3  | 1  | 0  | 0  |

Overall survival (years)

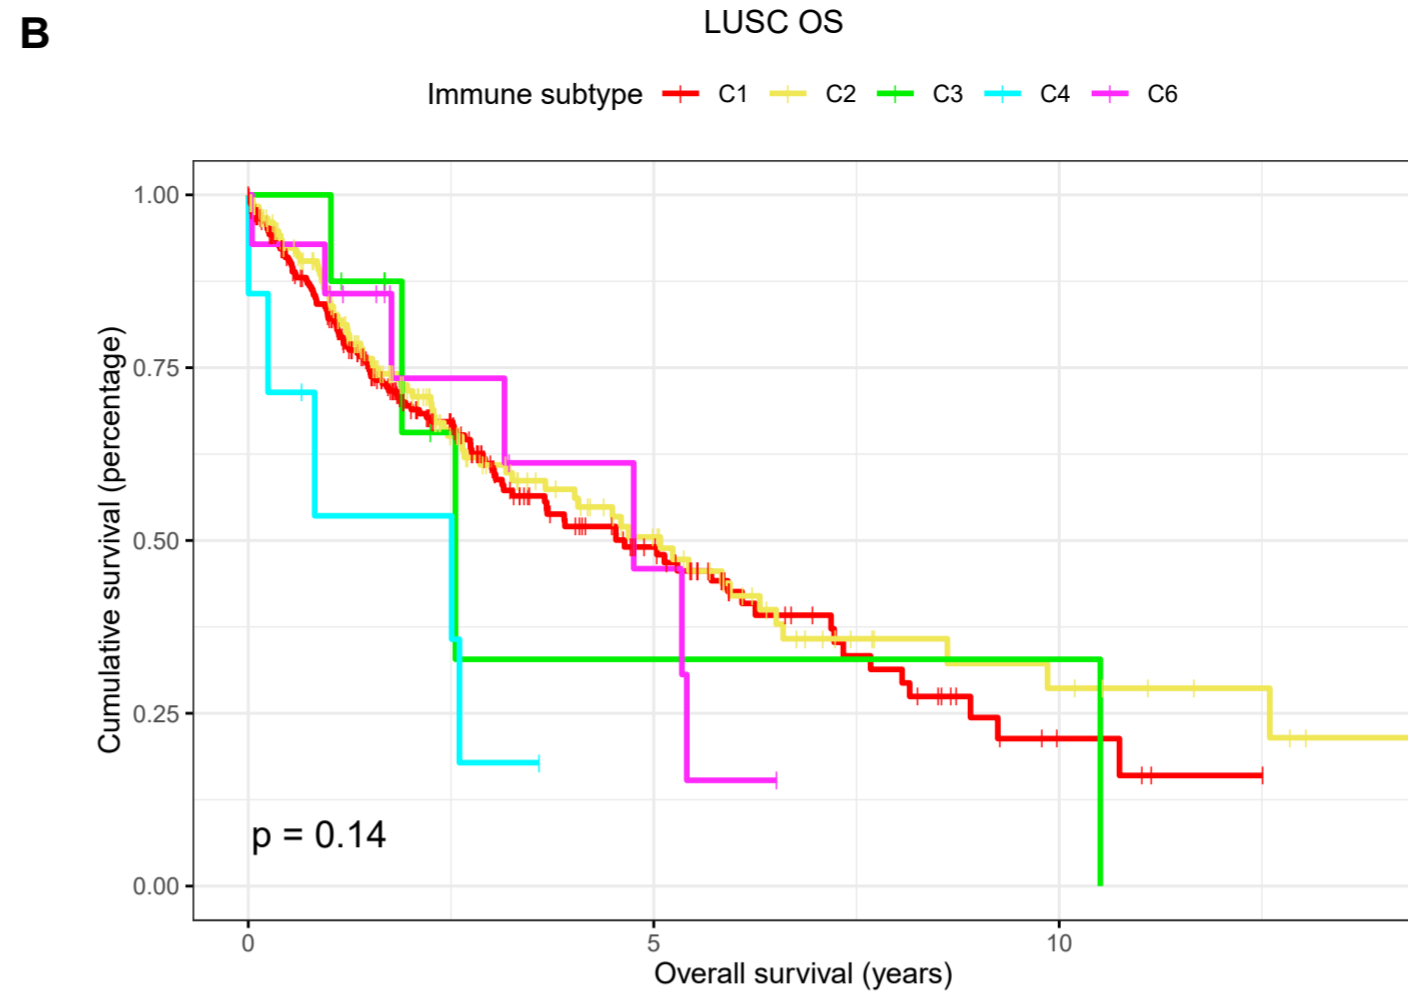

Number at risk

| Immune subtype | 0   | 5  | 10 |
|----------------|-----|----|----|
| C1             | 270 | 45 | 4  |
| C2             | 181 | 33 | 8  |
| C3             | 8   | 1  | 1  |
| C4             | 7   | 0  | 0  |
| C6             | 14  | 3  | 0  |

Overall survival (years)

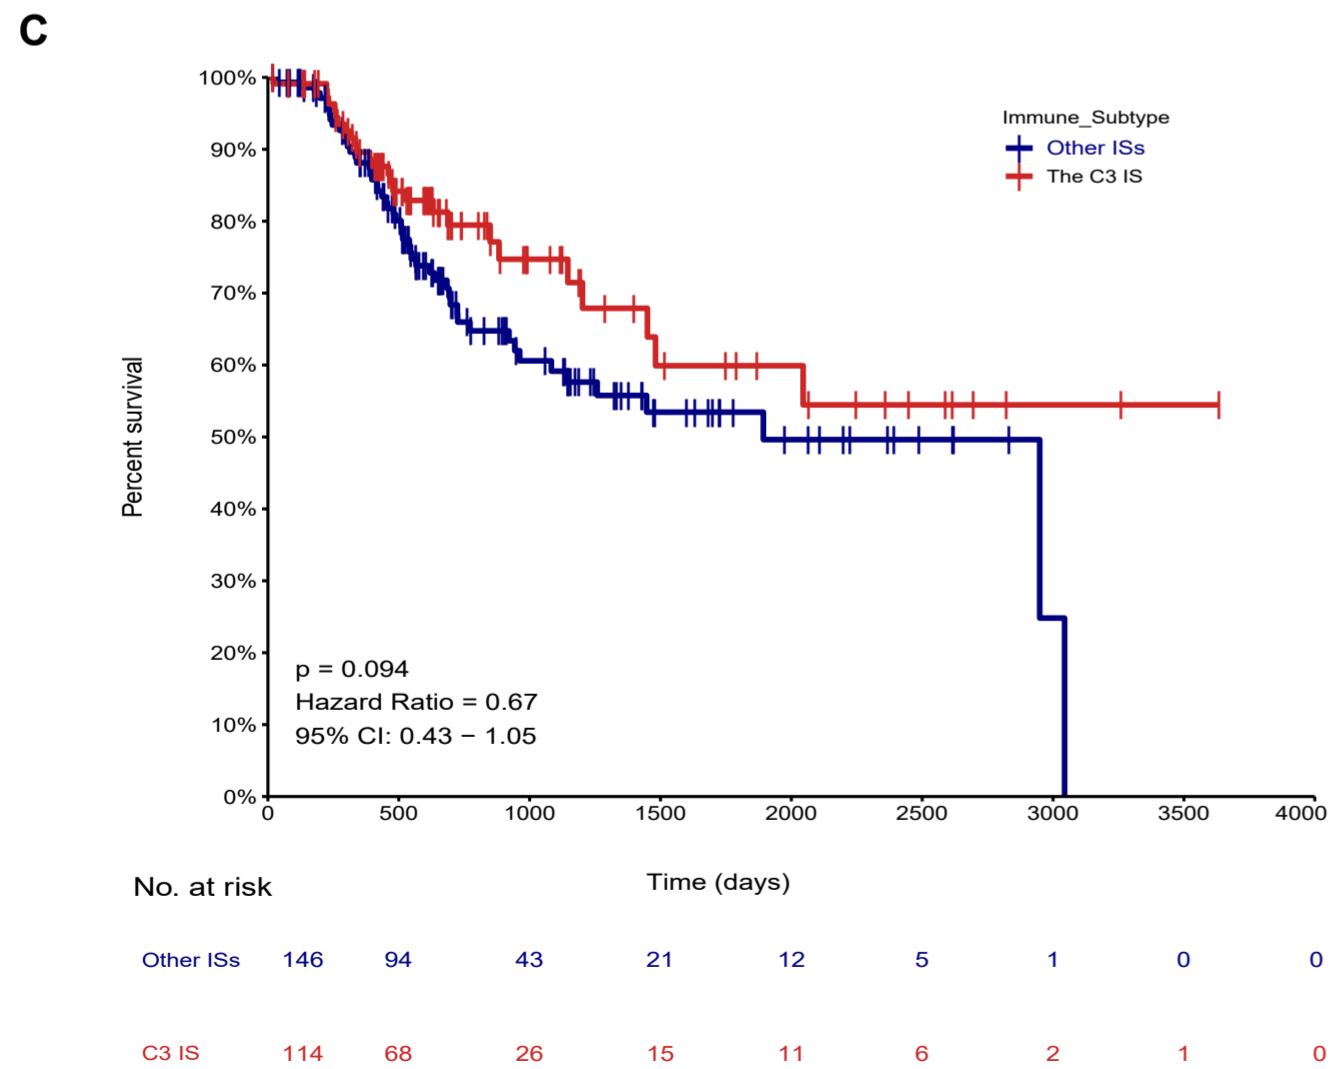

# A

GSE31210 cohort (n=226)

Figure S2

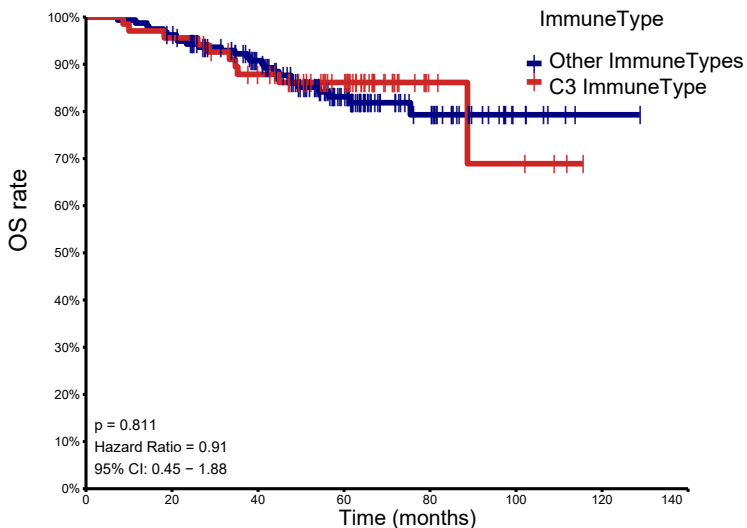

No. at risk

|                   |     |     |     |    |    |   |   |   |
|-------------------|-----|-----|-----|----|----|---|---|---|
| Other ImmuneTypes | 158 | 151 | 120 | 72 | 30 | 7 | 1 | 0 |
| C3 ImmuneType     | 68  | 65  | 53  | 38 | 6  | 4 | 0 | 0 |

# B

GSE31210 cohort (n=226)

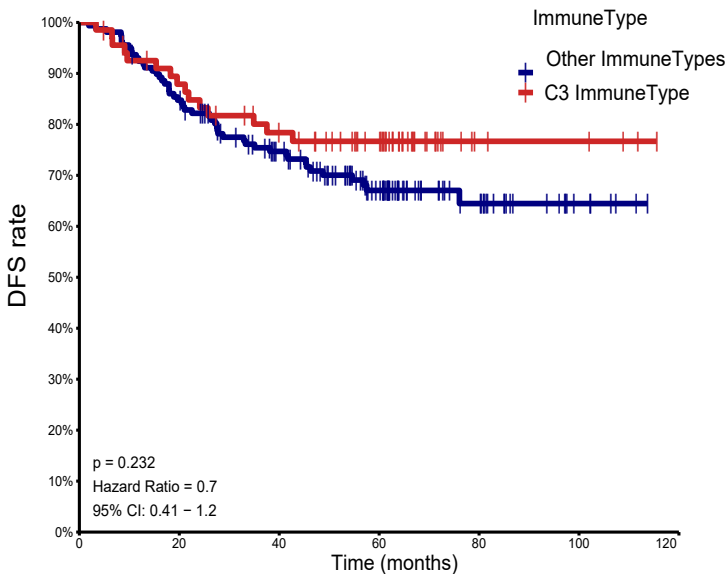

No. at risk

|                   |     |     |     |    |    |   |   |
|-------------------|-----|-----|-----|----|----|---|---|
| Other ImmuneTypes | 158 | 133 | 101 | 61 | 24 | 6 | 0 |
| C3 ImmuneType     | 68  | 57  | 46  | 34 | 5  | 4 | 0 |

**A**

All 4 GEO LUAD cohorts OS

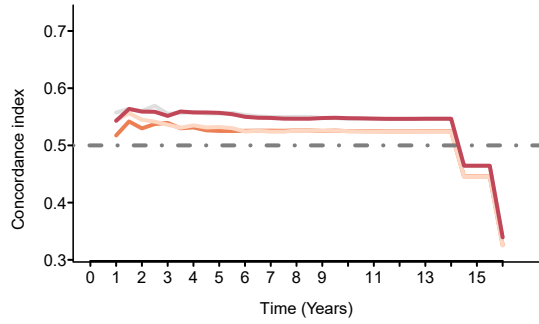**B**

All 4 GEO LUAD cohorts DFS

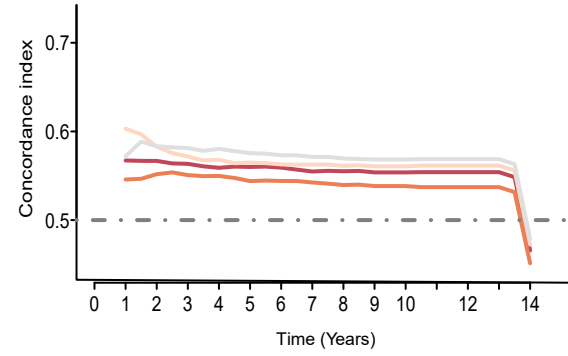**C**

GSE37745 LUAD cohorts OS (106 patients)

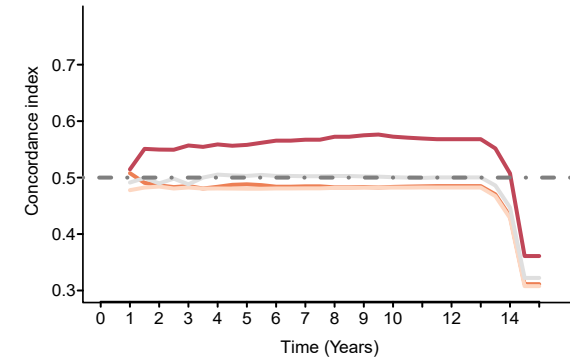**D**

GSE50081 LUAD cohort OS (127 patients)

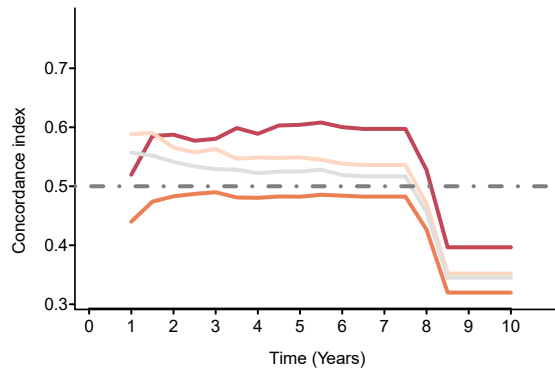**E**

GSE68465 LUAD cohort OS (442 patients)

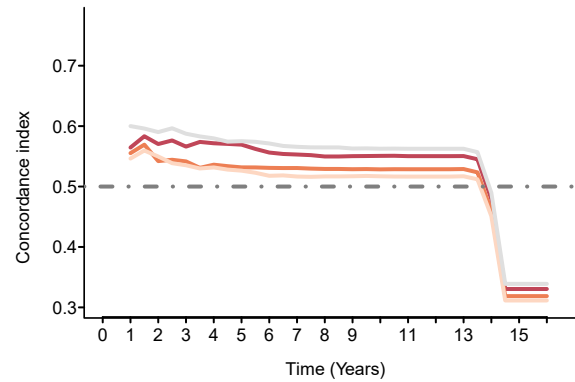**F**

GSE31210 LUAD cohort OS (226 patients)

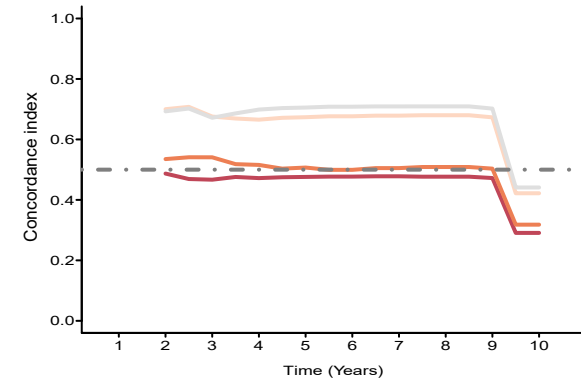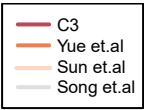

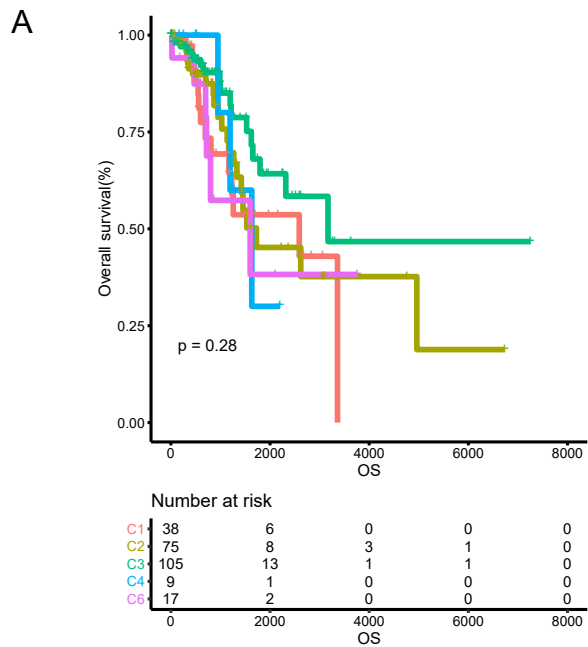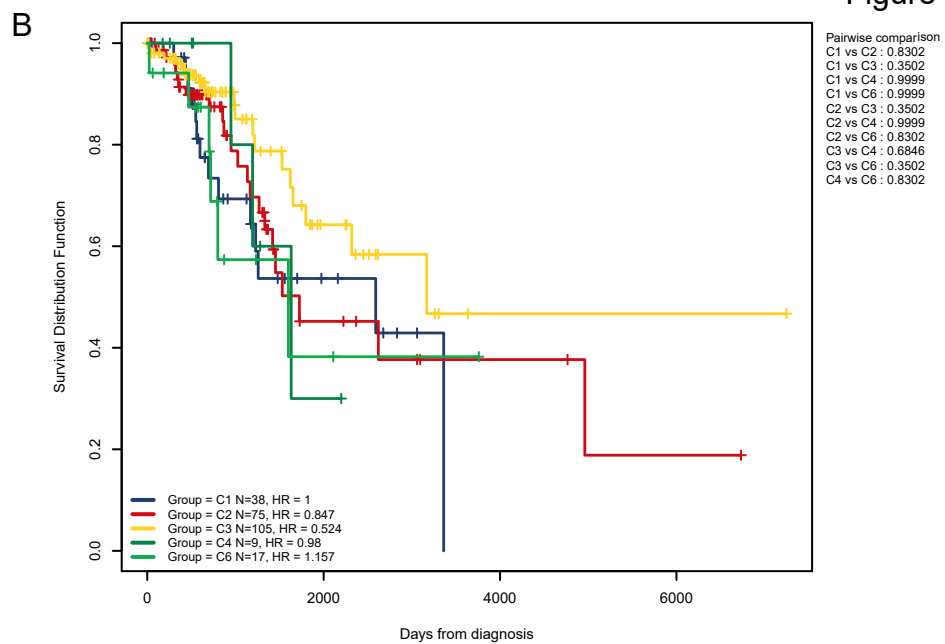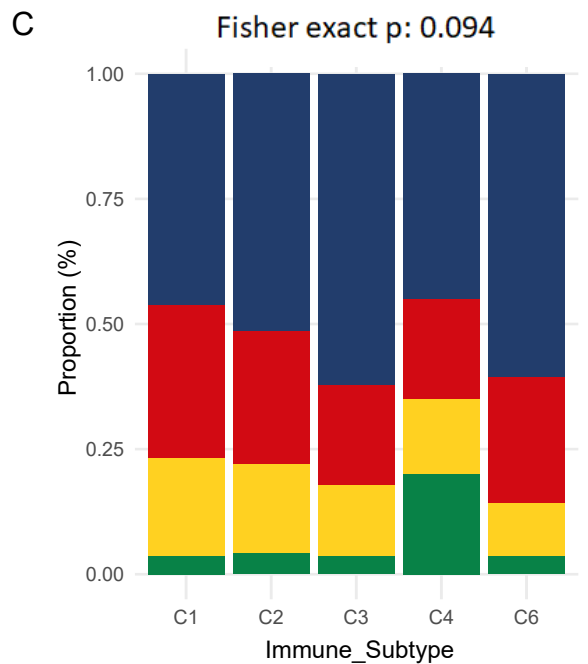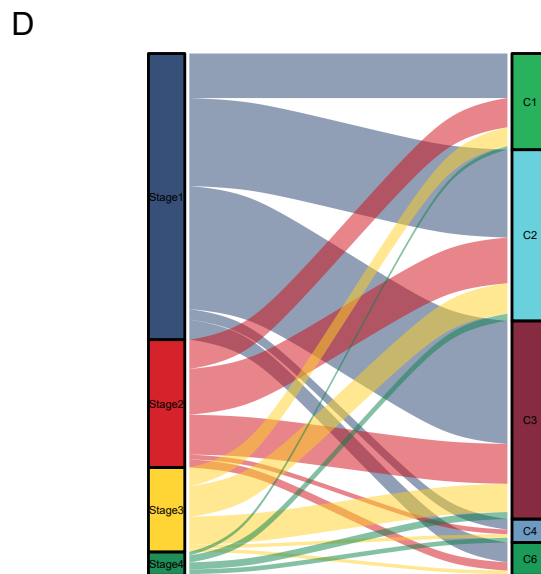

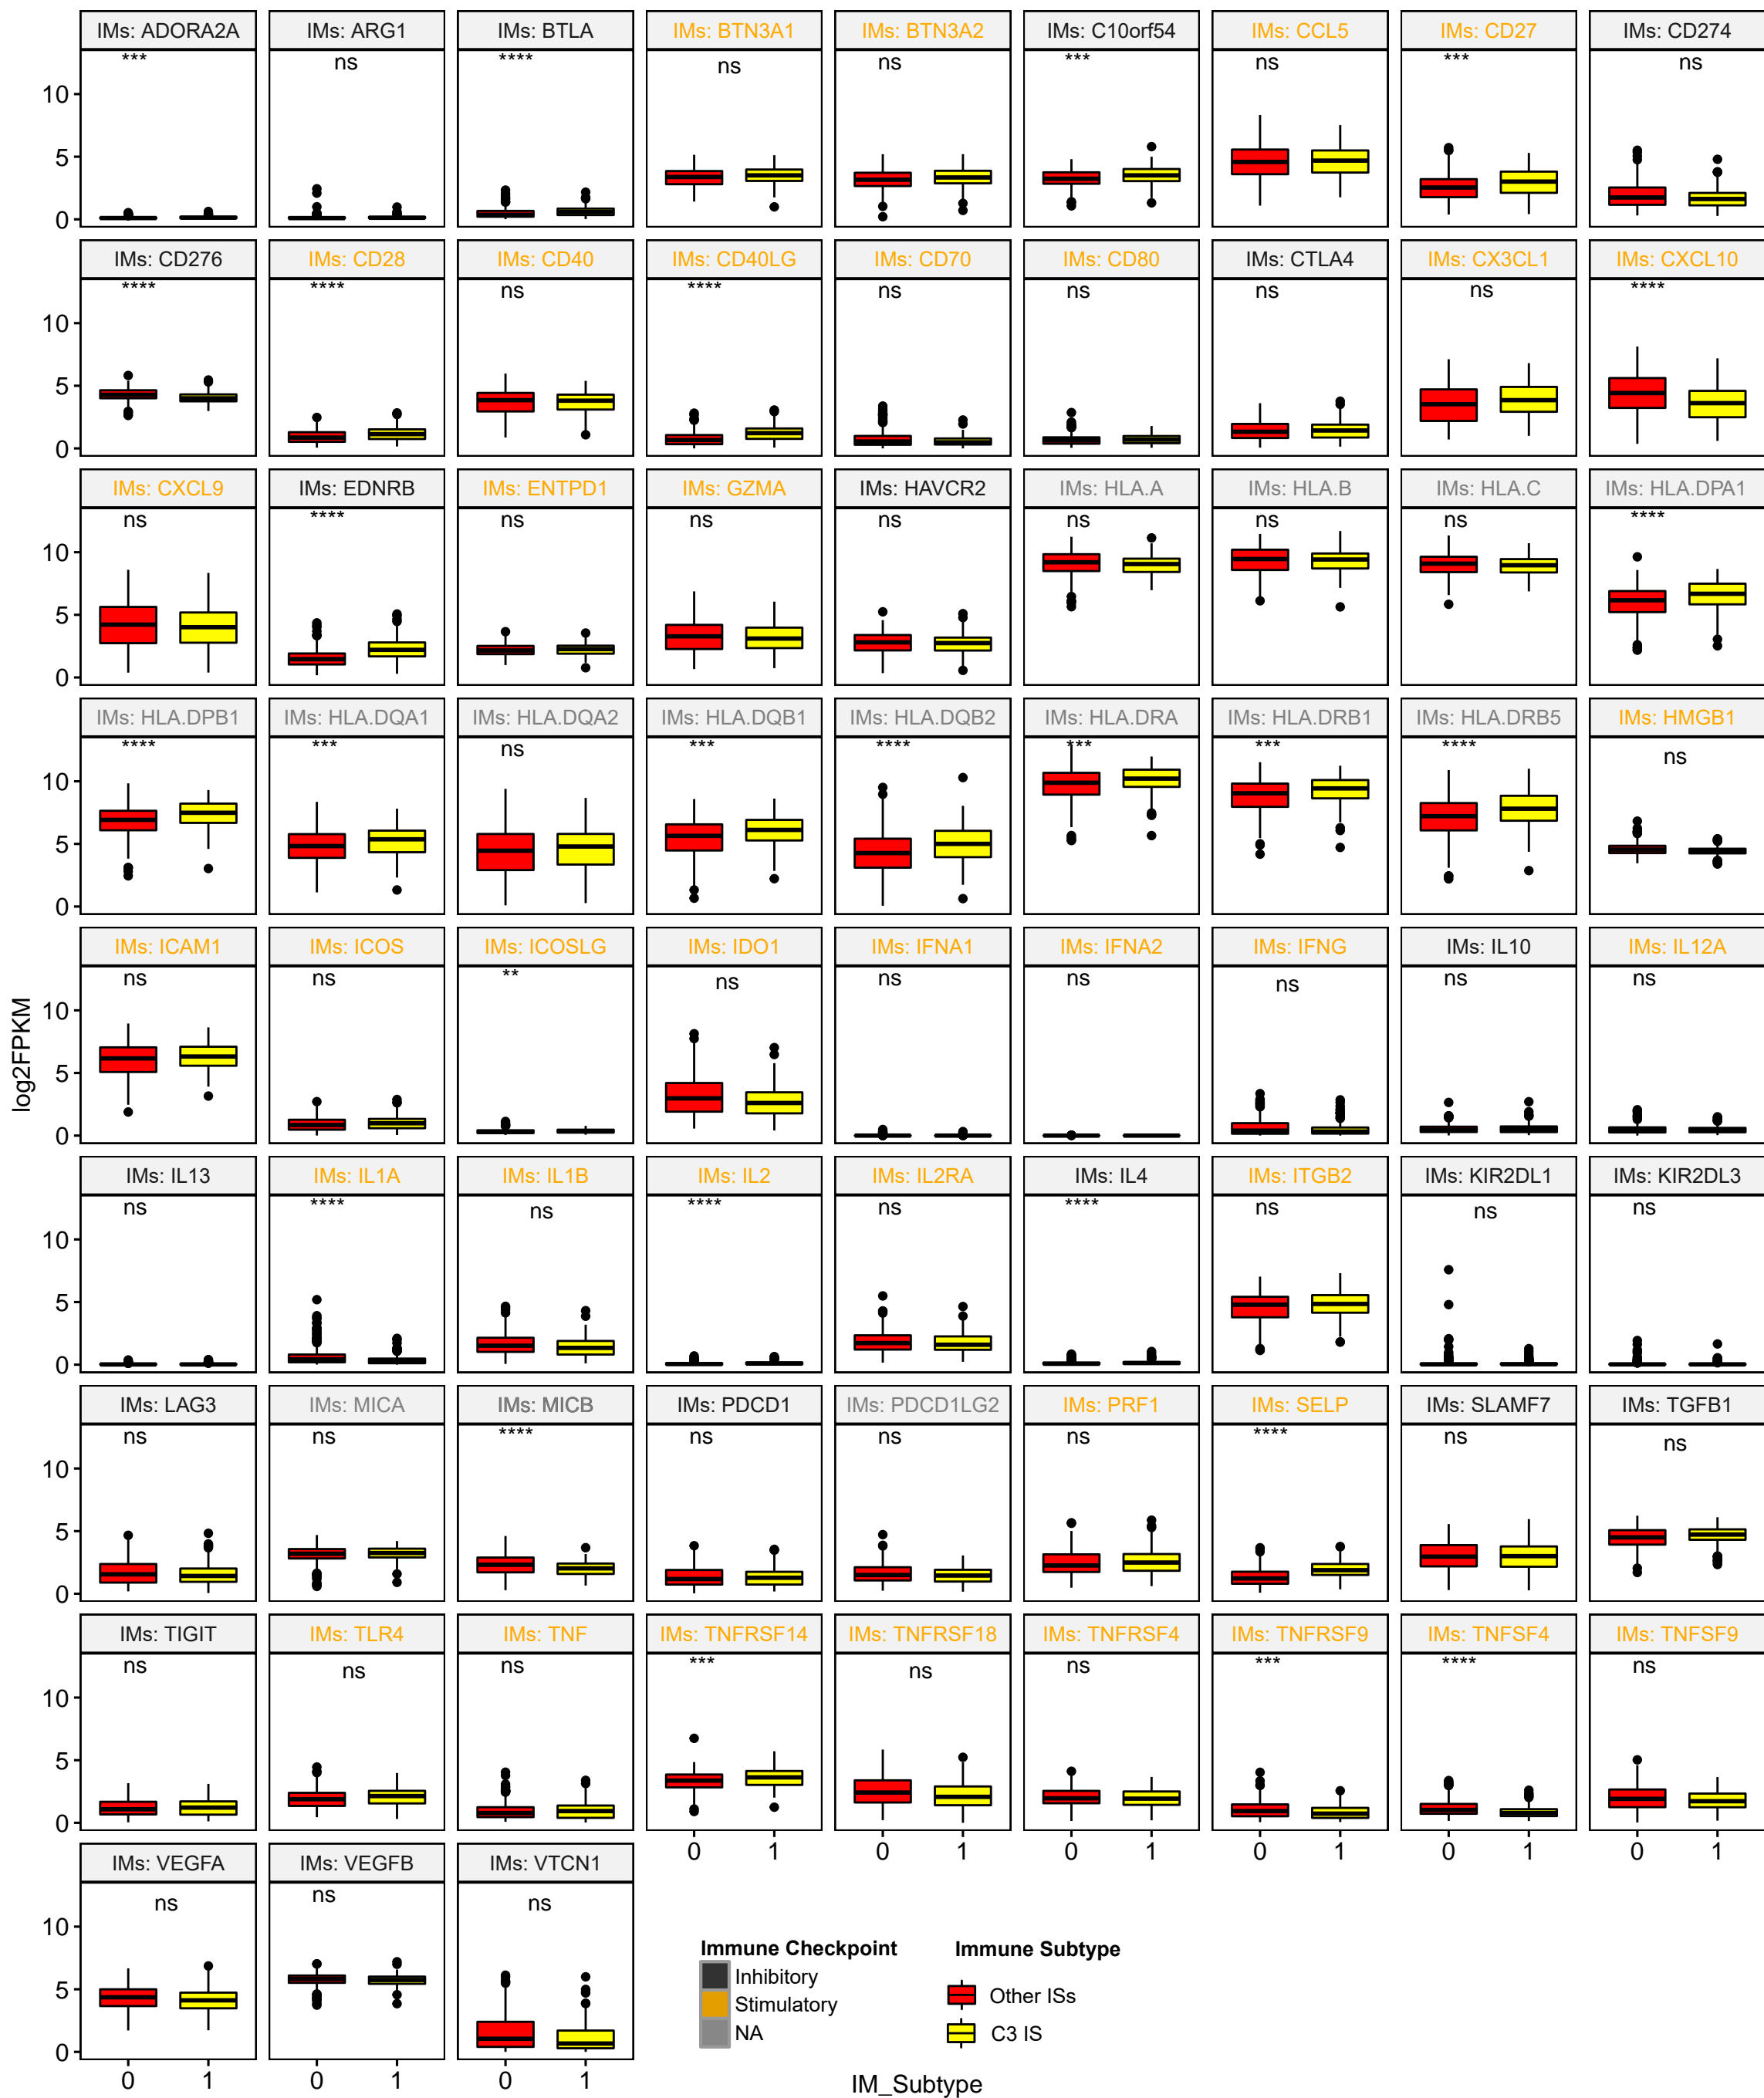



**A**Immune\_Subtype ■ Other ISs ■ C3

Figure S7

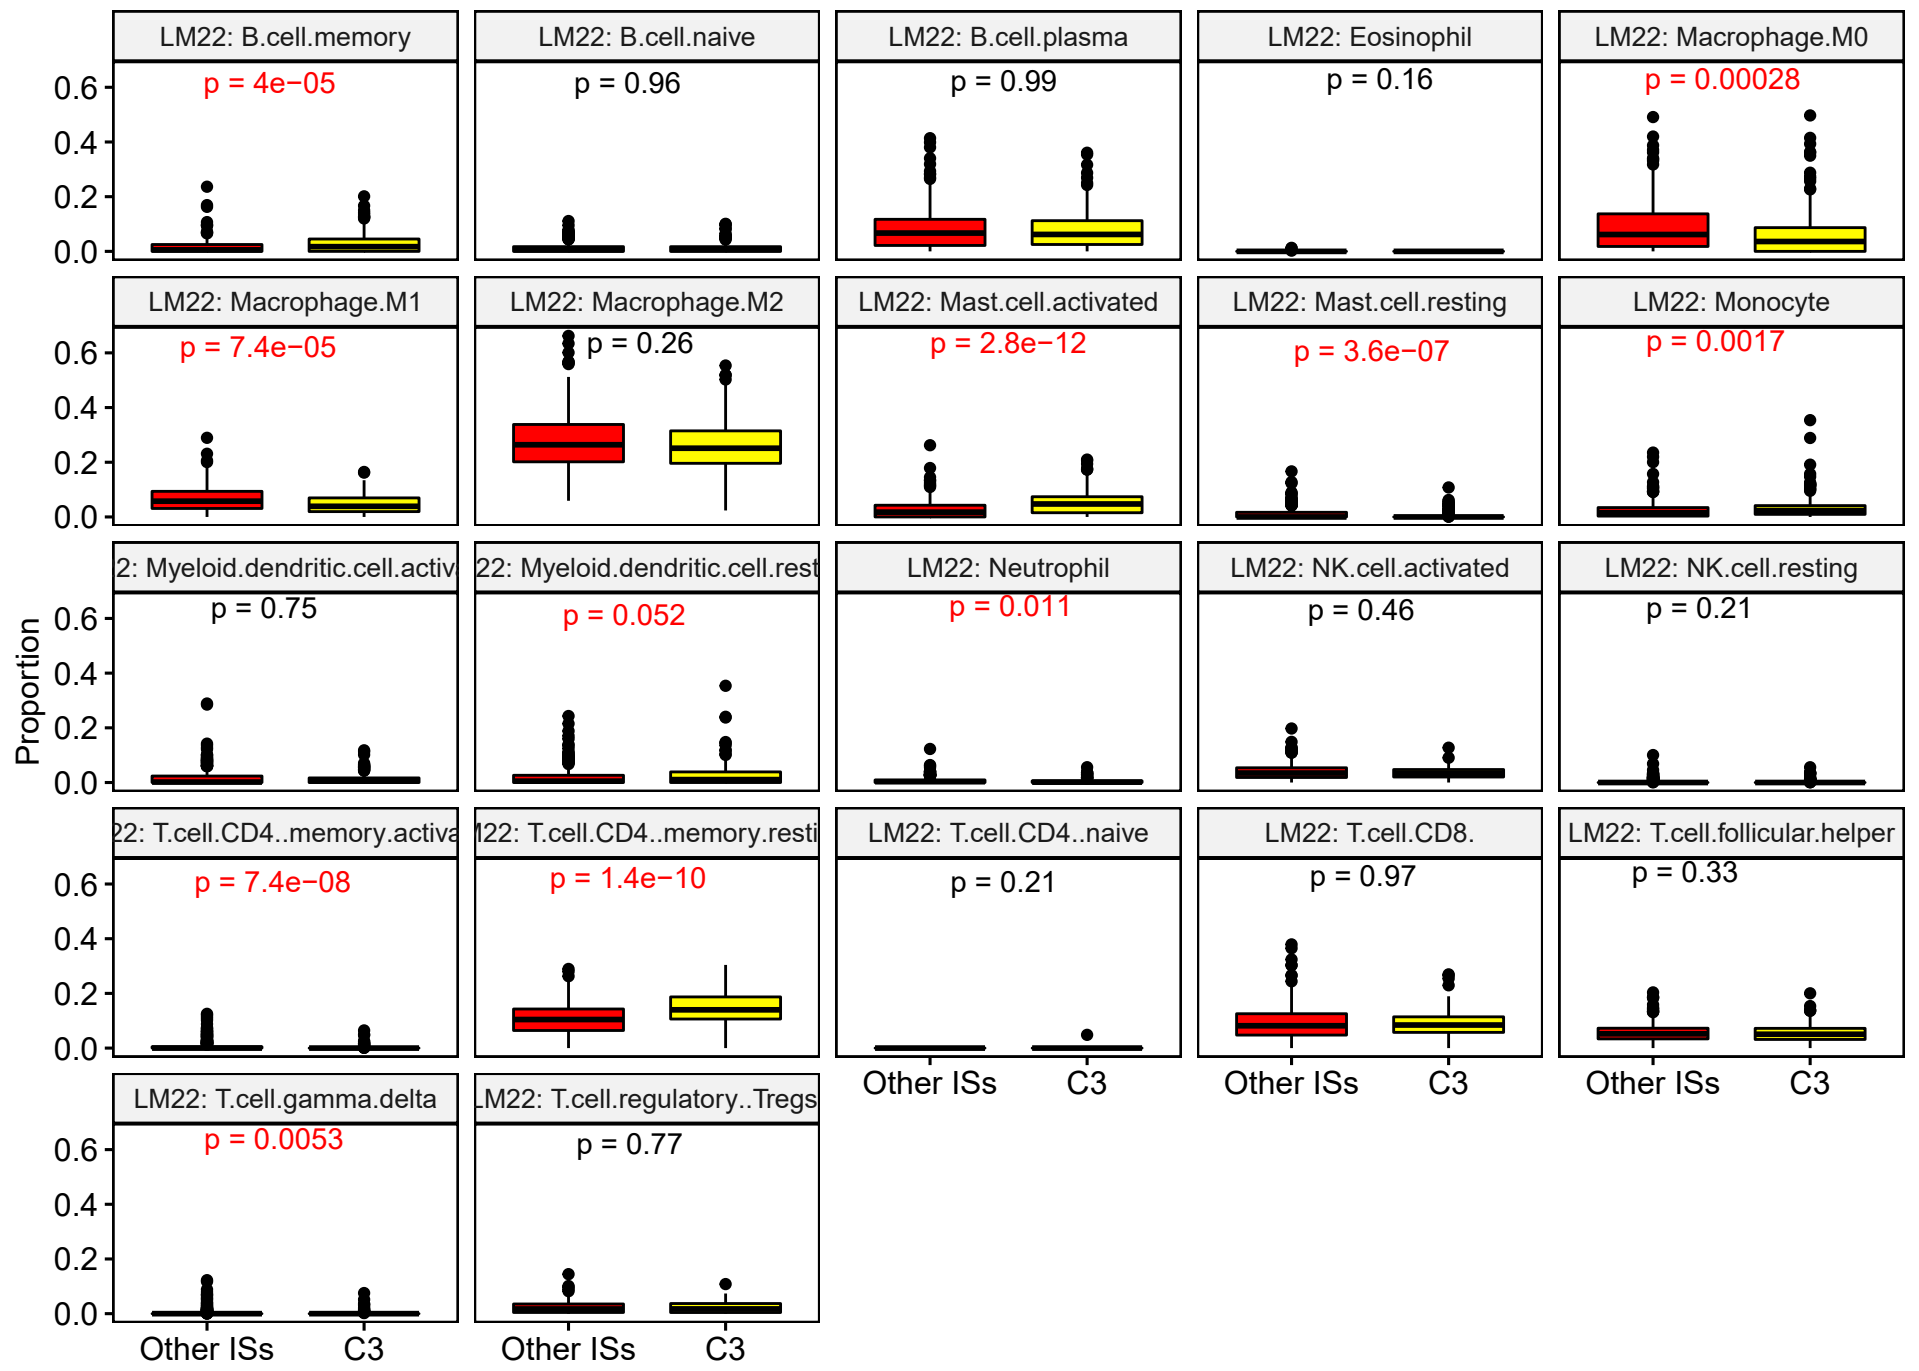**B**Immune\_Subtype ■ C2 ■ C3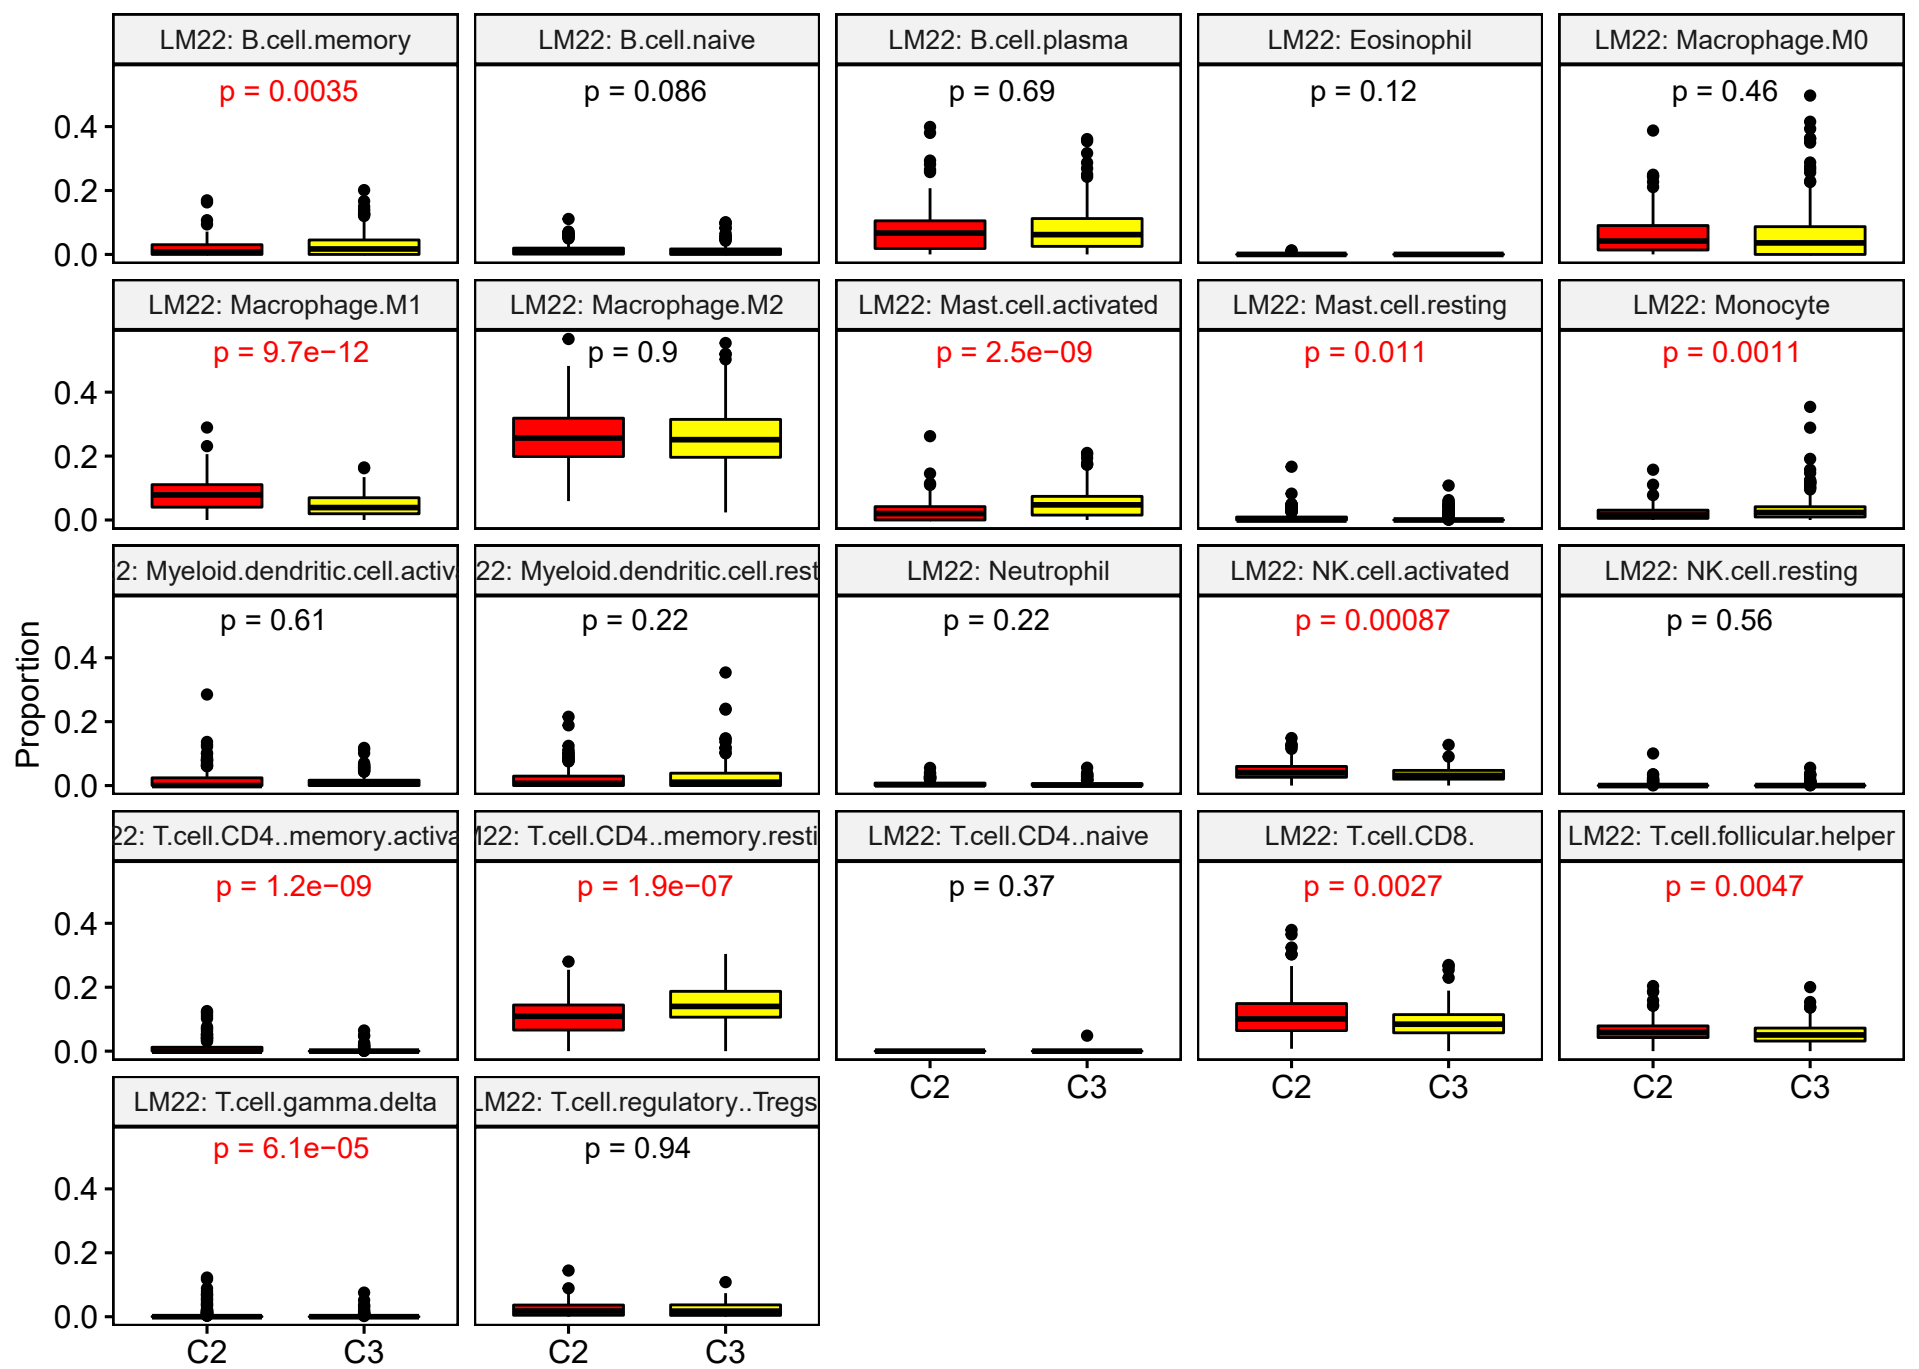

Supplement: DataSheet_1.pdf [file DataSheet_1.pdf]
